# Supplementary material for: Pharmacological profiling in CLL patients during pirtobrutinib therapy and disease progression
Source: Research Square preprint supplement (doi:10.21203/rs.3.rs-6249480/v1), 2025-03-31
Supplement: Supplementary file 1 [file fd0378b34e270d3293c06003.pdf]

| Supplemental Table 1: BTK and PLCG2 mutations in patients at baseline and at time of progression |                                                        |                                                |
|--------------------------------------------------------------------------------------------------|--------------------------------------------------------|------------------------------------------------|
| Pt #                                                                                             | BTK-Baseline                                           | BTK- At time of progression                    |
| 1                                                                                                | BTK (C481S 2%)                                         | BTK (L528W, 78%)                               |
| 2                                                                                                | BTK C481R                                              | N/A                                            |
| 3                                                                                                | BTK (C481S, C481S, T474I)                              | BTK ( T474I 73%, V416K 5%, V416I 5%)           |
| 4                                                                                                | BTK (C481R, 5%)                                        | BTK (L528W, 72%)                               |
| 5                                                                                                | BTK (C481S 5%, C481S 63%)                              | BTK (T474I, 87%)                               |
| 6                                                                                                | BTK C481R                                              | N/A                                            |
| 7                                                                                                | BTK (C481F 23%, C481S 18%)                             | BTK (L528W 93%)                                |
| 8                                                                                                | BTK (T474I, C481R 5%)                                  | BTK (T474I 9% )                                |
| 9                                                                                                | BTK (C481S 5%, C481R 18%); PLCG2 (D993G 7%, M1141K 7%) | BTK (C481S 5%, C481R 12%); PLCG2 (M1141K < 5%) |
| 10                                                                                               | BTK(C481R)                                             | BTK (L528W 7%, C481R 12%, T474I 83%)           |
| 11                                                                                               | BTK (C481S, 6%)                                        | BTK (T474I, 28%)                               |
| 12                                                                                               | WT                                                     | WT                                             |
| 13                                                                                               | WT                                                     | WT                                             |
| 14                                                                                               | WT                                                     | BTK (L528W 23%, A428D 11%)                     |
