# Supplementary material for: Pharmacological profiling in CLL patients during pirtobrutinib therapy and disease progression
Source: Research Square preprint supplement (doi:10.21203/rs.3.rs-6249480/v1), 2025-03-31
Supplement: Supplementary file 1 [file febd25e9887049fdc0fa11cf.docx]

**Supplemental Figure Legends**

**Supplemental Figure 1. Median Progression Free survival for CLL patients** on BRUIN trial enrolled at MD Anderson and analyzed in the present project. Kaplan Meier curve showing the median progression survival (PFS) of CLL patients (n=25) at MD Anderson Cancer Center. Median PFS was 18.5 months.

**Supplemental Figure 2. Correlation between baseline features and progression free survival of CLL patients (n=25).** Kaplan Meier curves showing progression free survival of patients with different baseline features. **A.** All patients with XPO1 mutation had progressed with a median PFS of 12 months as compared to unreached PFS for those without XPO1 mutation. Log rank test= 7.7, p value (0.005), log-rank Hazard Ratio (HR)= 11 with 95% CI = 2 to 60.1. **B.** PFS was not statistically different between those with TP53/17pdel mutation (PFS= 17 months) and WT TP53/17p (PFS 28.5 months), log- rank Mantel-Cox test is 1.083, p-value= 0.2. log rank HR= 1.7 with 95% CI= 0.6 to 4.9. **C.** Similar PFS for both mutant and WT ATM (median PFS= 19 months for both), with log-rank Mantel-Cox test of 0.12, p-value 0.73, HR= 1.2 with 95% CI= 0.39 to 3.7. **D.** similar median PFS between those with 13q del (PFS= 21 months) and those without 13q del (PFS= 18 months), log-rank Mantle-Cox test= 0.03, p-value= 0.8, log rank HR= 1.1 with 95% CI= 0.38 to 3.1. **E.** No statistically significant difference between those with Notch1 mutation (unreached PFS) and those without Notch1 mutation (PFS= 18 months), log-rank Mantel-Cox test= 1.8, p-value= 0.17, log rank HR= 0.4, with 95% CI= 0.15 to 1.3. **F.** No statistically significant difference between those with Trisomy 12 (PFS= 14.5 months) and those without trisomy12 (PFS= 21 months), log-rank Mantel-Cox test= 1, p-value= 0.3, log-rank HR= 1.8, with 95% CI= 0.39 to 8.8.

**Supplemental Figure 3. Baseline mutant BTK shows higher risk of disease progression and acquiring second site BTK mutation. A**. a donut chart showing the relative distribution of BTK status at baseline. **B**. - table showing similar baseline features between WT BTK and mutant BTK cohorts, except for prior cBTKi r/r and CK, that were relatively higher in the mutant BTK cohorts. **C.** Bar graph showing higher risk of disease progression for those with baseline mutant BTK even after considering only those with prior cBTKi r/r and excluding those with prior cBTKi intolerance. **D.** Bar graph showing a higher risk for baseline mutant BTK to acquire a second site BTK mutation at time of disease progression. **E.** Graph showing a shorter time to progression with mutant BTK as compared to WT BTK. There was in relation in the type of baseline BTK mutation and time to progression. Abbreviations. Mt, mutant; WT, wildtype; on Rx, on pirtobrutinib therapy; PD, disease progression on pirtobrutinib.

**Figure 4. Venetoclax and APR-246 addition to pirtobrutinib augment apoptotic response at time of PD. A.** Graph showing Annexin-PI negative rate (cell viability) after ex-vivo incubation of PBMNCs with venetoclax, AZD5991 or ibrutinib alone or in combination with pirtobrutinib at time of disease progression (Loxo-305) for the indicated time points. Venetoclax and AZD5991, but not ibrutinib, can augment apoptotic response when combined with pirtobrutinib at time of disease progression. **B.** Graph showing Annexin-PI negative rate (cell viability) after ex-vivo incubation of PBMNCs with APR-246 and trametinib alone or in combination with pirtobrutinib at time of disease progression for the indicated time points. APR-246 shows activity alone or in combination with pirtobrutinib. **C.** Graph showing Annexin-PI negative rate (cell viability) for those **with BCL-2 mutations** after ex-vivo incubation of PBMNCs with venetoclax, AZD5991 or ibrutinib alone or in combination with pirtobrutinib at time of disease progression (Loxo-305) for the indicated time points. Ex-vivo data shows that the combination of venetoclax with BTKi as the most effective combination for those high-risk patients. Abbreviations. IBR, ibrutinib; AZD, AZD5991; Loxo, pirtobrutinib.

**Supplemental Figure 5. Pharmacogenomic and pharmacological profiling in PBMCs at time of Disease progression**. PBMCs were obtained from 11 patients after they fail pirtobrutinib. Cells were incubated with indicated drugs alone and in combination. **A**. Heat map showing Apoptosis % to target agents alone or in combination in correlation to baseline genetic features. Generally, combination approach is highly effective regardless of baseline genetic features. **B**. Volcano blot showing the p-values of pharmacogenomic correlation of different target therapies. At strict p value (0.01), BCL-2 mutation significantly decreased apoptosis %, particularly to venetoclax and ibrutinib as compared to WT BCL-2. Interestingly, those with XPO1 mutation were significantly sensitive to ibrutinib. **C**. Heat map showing percent apoptosis to targeted agents alone or in combination related to prior cBTKi alone or prior cBTKi+ venetoclax. Generally, those with prior cBTKi alone showed higher apoptosis to targeted agents alone or in combination as compared to those who received prior cBTKi + venetoclax. Abbreviations, APR, APR-246; VEN, venetoclax, IBR, ibrutinib; AZD, AZD5991
